# Supplementary material for: Heterologous Expression of Mersacidin in Escherichia coli Elucidates the Mode of Leader Processing
Source: PubMed Central journal article supplement — ACS Synth Biol. 2021 Mar 10;10(3):600–8. doi: 10.1021/acssynbio.0c00601 (PMC7985838; doi:10.1021/acssynbio.0c00601), 2021-03-10
Supplement: sb0c00601_si_001.pdf [file sb0c00601_si_001.pdf]

## **Supplementary information to:**

### **Heterologous expression of mersacidin in *Escherichia coli* elucidates the mode of leader processing**

**Jakob H. Viel<sup>1</sup>, Ate H. Jaarsma<sup>2</sup>, Oscar P. Kuipers<sup>1\*</sup>**

<sup>1</sup>Department of Molecular Genetics, University of Groningen, Nijenborgh 7, 9747 AG, Groningen, The Netherlands.

<sup>2</sup>Present address: Department of Environmental Science, Aarhus University, Frederiksborgvej 399, 4000 Roskilde, Denmark.

**\*Correspondence:**

Oscar P. Kuipers  
[o.p.kuipers@rug.nl](mailto:o.p.kuipers@rug.nl)

## Contents

|                                                                                                                             |    |
|-----------------------------------------------------------------------------------------------------------------------------|----|
| Figure S1 Comparison of <i>mrsM</i> from <i>Bacillus amyloliquefaciens</i> BH072 and <i>Bacillus</i> sp. HIL-Y85/54728..... | 3  |
| Figure S2 Antimicrobial activity test of His-MrsA + MrsM + MrsD and BH072 supernatant .....                                 | 4  |
| Figure S3 Antimicrobial activity test of HPLC fractions .....                                                               | 5  |
| Figure S4 Antimicrobial activity test of MrsT150-His cleaved His-premersacidin .....                                        | 6  |
| Figure S5 MALDI-TOF analysis of BH072 supernatant.....                                                                      | 7  |
| Figure S6 LC-MS of His-MrsA + MrsM and His-MrsA + MrsM + MrsD fractions .....                                               | 8  |
| Figure S7 Optimization of the expression protocol.....                                                                      | 11 |
| Table S1 List of primers used in this study.....                                                                            | 18 |
| Table S2 HPLC protocol .....                                                                                                | 19 |
| Table S3 Mersacidin mass tables .....                                                                                       | 20 |
| Table S4 Table of approximate percentage activatable peak of total product as determined by HPLC .....                      | 21 |
| References.....                                                                                                             | 22 |

**Figure S1** Comparison of *mrsM* from *Bacillus amyloliquefaciens* BH072 and *Bacillus* sp. HIL-Y85/54728

|                  |      |                                                              |
|------------------|------|--------------------------------------------------------------|
| mrsM BH072       | 2581 | CCAGCCTCCGGATTTGCTCATGGTGCCTCAGGAATTATATGGGCTCTTTATGAGATTTAC |
| mrsM HIL-Y85/547 | 2581 | .....                                                        |
| mrsM BH072       | 2641 | GCAATTACTGAGCAAACGTATTTAAAGAGGTAGCTGAAAAAGCGTTAGAATTTGAAAGA  |
| mrsM HIL-Y85/547 | 2641 | ..... <b>A</b> .....                                         |
| mrsM BH072       | 2701 | ACTTTGTTTATTCGGAAAAAACAATTGGGCAGATATTAAACTTGAAAACGGACAGTTT   |
| mrsM HIL-Y85/547 | 2701 | .....                                                        |
| mrsM BH072       | 2761 | CGAAATGATAATTTTGTGCTTGGTGTAAATGGCGCAGCAGGCATAGGATTAAGTAGGATA |
| mrsM HIL-Y85/547 | 2761 | .....                                                        |
| mrsM BH072       | 2821 | TTGATCCTGCCACACAATCAAAATGAATTGATAAAAGATGAAGCACATGTCGCAATTAAT |
| mrsM HIL-Y85/547 | 2821 | .....                                                        |
| mrsM BH072       | 2881 | ACAACCCTAAAATATGGTTTTGAACATGATCATTCTTTATGCCATGGTGATTAGGTAAT  |
| mrsM HIL-Y85/547 | 2881 | ..... <b>A</b> .....                                         |
| mrsM BH072       | 2941 | CTGGACATCCTTATGTACGCAGCGGAAAACTTTAATAAAAAGTTAAGCGTAAATGTAACA |
| mrsM HIL-Y85/547 | 2941 | .....                                                        |
| mrsM BH072       | 3001 | GAACTAAGCCATAAAATTTTAAATGATATAAAGCTCAGAGGATGGTTAACTGGATTTGAA |
| mrsM HIL-Y85/547 | 3001 | .....                                                        |
| mrsM BH072       | 3061 | AAAAATAACGAATCCCCATCCTTAATGATGGGGTATGCAGGTATAGGACTTGGATTGCTT |
| mrsM HIL-Y85/547 | 3061 | .....                                                        |
| mrsM BH072       | 3121 | AAGATTTTGCACCGACTGAAGTGCCATCAGTTTTGAGACTCCAATCACCTTTAGAACTA  |
| mrsM HIL-Y85/547 | 3121 | ..... <b>AGTC</b> .....                                      |
| mrsM BH072       | 3181 | AAATTGTAA                                                    |
| mrsM HIL-Y85/547 | 3181 | .....                                                        |

**Figure S1 A** Alignment of the MrsM nucleotide sequence. To confirm functionality of the biosynthetic genes from BH072, the nucleotide sequence of the mersacidin gene cluster was compared between known mersacidin producer HIL-Y85/54728 (AJ250862.2)<sup>1,2</sup> and *Bacillus amyloliquefaciens* BH072 (CP009938.1)<sup>3</sup>. The intergenic sequence was found to be identical for all biosynthetic genes except *mrsM*, which contains six nucleotide mutations. These mutations in turn result in three amino acids

|                  |      |                                                              |
|------------------|------|--------------------------------------------------------------|
| mrsM BH072       | 841  | IQNINVMEKGVGWKVPANPTPASGFHAGASGIIWALYEIYAITEQTVFKEVAEKALEFER |
| mrsM HIL-Y85/547 | 841  | ..... <b>K</b> .....                                         |
| mrsM BH072       | 901  | TLFIPEKNNWADIKLENGQFRDNFVAWCNGAAGIGLSRILILPHNQNELIKDEAHVAIN  |
| mrsM HIL-Y85/547 | 901  | .....                                                        |
| mrsM BH072       | 961  | TTLKYGFEDHSLCHGDLGNLDILMYAAENFNKKLSVNVTELSHKILNDIKLRGWLTFE   |
| mrsM HIL-Y85/547 | 961  | ..... <b>Q</b> .....                                         |
| mrsM BH072       | 1021 | KNNESPSLMMGYAGIGLGLLKIIFAPTEVPSVLRQLQSPLELKL                 |
| mrsM HIL-Y85/547 | 1021 | ..... <b>V</b> .....                                         |

difference: K884E, Q971H, V1046T.

**Figure S1 B** Alignment of the MrsM amino acid sequences. The alignment shows the amino acid sequence mutations K884E, Q971H, V1046T. In the process of expression optimization, the effect of these amino acid differences was found to be negligible, if not positive, compared to the HIL-Y85/54728 sequence.

**Figure S2** Antimicrobial activity test of His-MrsA + MrsM + MrsD and BH072 supernatant

**Figure S2** Antimicrobial activity test of His-MrsA + MrsM + MrsD. His-MrsA + MrsM + MrsD was digested by BH072 supernatant from cultures with different growth times and spotted on a Ø140 mm plate. All samples were incubated at 37 °C for 30 minutes, after which 9 µl of each sample was spotted. His-MrsA + MrsM + MrsD can be activated by supernatant of all growth times. The supernatant exhibits no antimicrobial activity.

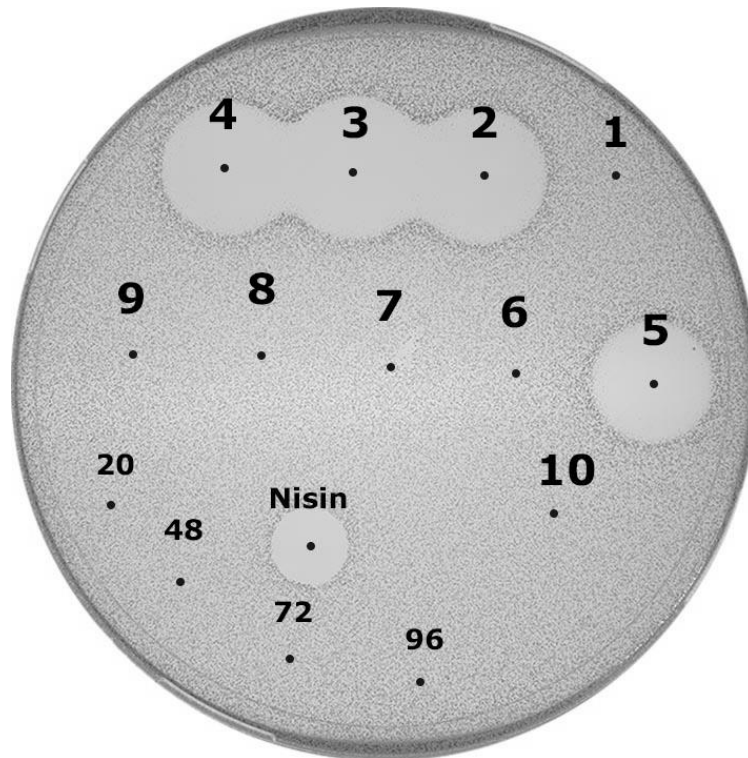

|       | His-MrsA + MrsM + MrsD in 5 mM PO <sub>4</sub> buffer | 5 mM PO <sub>4</sub> buffer | BH072 supernatant |
|-------|-------------------------------------------------------|-----------------------------|-------------------|
| 1     | 7 µl                                                  | 3 µl                        |                   |
| 2     | 7 µl                                                  |                             | 20 h 3 µl         |
| 3     | 7 µl                                                  |                             | 48 h 3 µl         |
| 4     | 7 µl                                                  |                             | 72 h 3 µl         |
| 5     | 7 µl                                                  |                             | 96h 3 µl          |
| 6     |                                                       | 10 µl                       |                   |
| 7     |                                                       | 7 µl                        | 20 h 3 µl         |
| 8     |                                                       | 7 µl                        | 48 h 3 µl         |
| 9     |                                                       | 7 µl                        | 72 h 3 µl         |
| 10    |                                                       | 7 µl                        | 96h 3 µl          |
| 20    | <i>B. amyloliquefaciens</i> supernatant BH072 20 h    |                             |                   |
| 48    | <i>B. amyloliquefaciens</i> supernatant BH072 48 h    |                             |                   |
| 72    | <i>B. amyloliquefaciens</i> supernatant BH072 72 h    |                             |                   |
| 96    | <i>B. amyloliquefaciens</i> supernatant BH072 96 h    |                             |                   |
| Nisin | Nisin 25 ng / µl                                      |                             |                   |

**Figure S3** Antimicrobial activity test of HPLC fractions

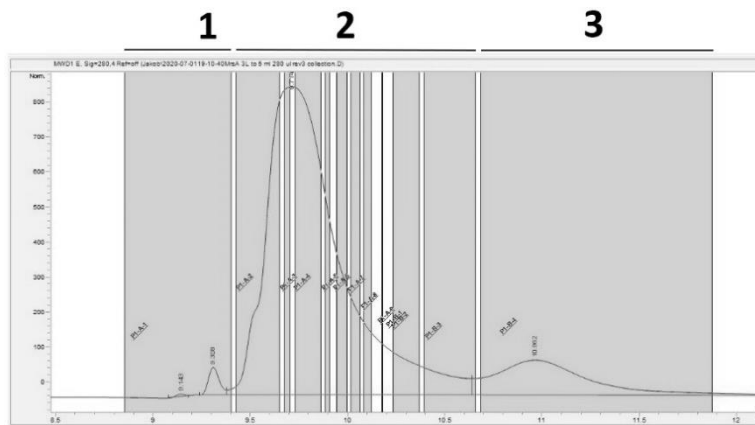

**Figure S3 A** Separation of His-MrsA + MrsM + MrsD by HPLC. The freeze-dried samples from open C18 column were dissolved in Milli-Q, and separated in three fractions by HPLC. These fractions were freeze-dried and dissolved in Milli-Q.

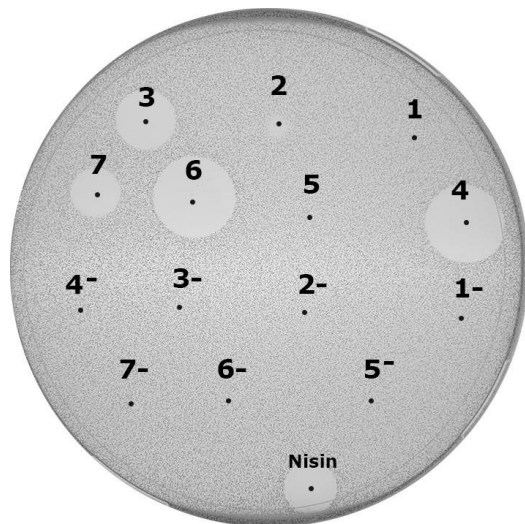

|   | Sample                                                            |
|---|-------------------------------------------------------------------|
| 1 | Milli-Q                                                           |
| 2 | Peak 2 (4200x concentrated)                                       |
| 3 | His-MrsA + MrsM + MrsD pre-HPLC preparation (600x concentrated)   |
| 4 | Peak 3                                                            |
| 5 | Peak 1                                                            |
| 6 | His-MrsA + MrsM + MrsD secondary purification (214x concentrated) |
| 7 | His-MrsA + MrsM + MrsD pre-HPLC preparation (300x concentrated)   |
|   | Nisin 25 ng / $\mu$ l                                             |

**Figure S3 B** Activity test of different HPLC fractions. The activatable fraction was identified by incubating 7  $\mu$ l of each fraction with 3  $\mu$ l BH072 supernatant (+) or 3  $\mu$ l Milli-Q (-). All samples were incubated at 37 °C for 30 minutes, after which 9  $\mu$ l was spotted on a  $\varnothing$ 140 mm plate. Peak 3 (spot 4) contains His-premersacidin. There is a small amount of activity from peak 2. However, this sample is eight times more concentrated than that of peak 3. The activity is most likely from the highly concentrated co-purified tail of peak 3.

**Figure S4** Antimicrobial activity test of MrsT150-His cleaved His-premersacidin

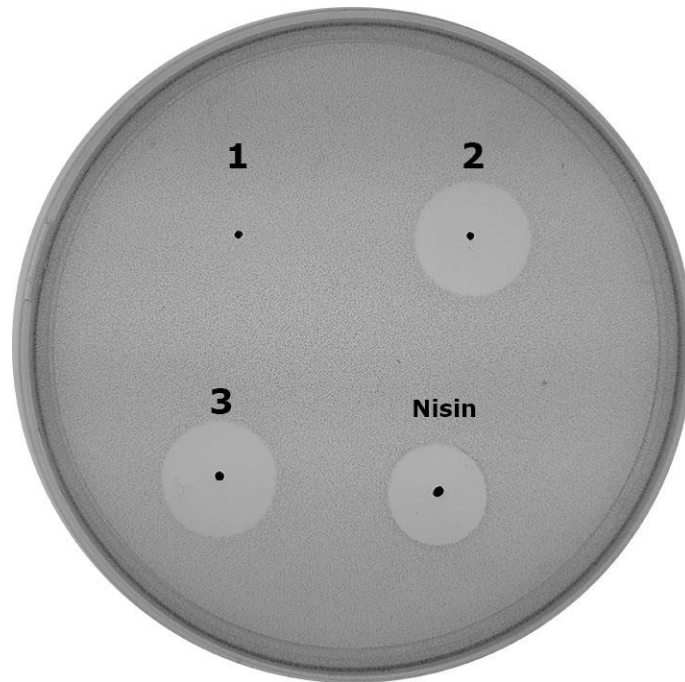

**Figure S4** Antimicrobial activity test of MrsT150-His cleaved His-premersacidin. *His-premersacidin* sample containing 1,5  $\mu$ l MrsT150-His His-tag elution was incubated for 3 hours at 37 °C in duplicate. After incubation, 2  $\mu$ l BH072 supernatant was added to one of the duplicates, and to a sample containing undigested His-premersacidin. All three samples were incubated for another 30 minutes at 37 °C, after which 9  $\mu$ l was spotted. MrsT150-His-digested pre-mersacidin and both supernatant digested samples were spotted in equal amounts of initial pre-mersacidin on an antimicrobial activity test-plate against *M. flavus* in a spotting volume of 9  $\mu$ l on a  $\varnothing$  90 mm plate. **1.** His-premersacidin + MrsT150-His **2.** His-premersacidin + MrsT150-His + BH072 **3.** His-premersacidin + BH072. Mersacidin cannot be activated by MrsT150-His alone. After incubation of His-premersacidin with MrsT, it can be activated after incubation with BH072 supernatant. However, incubation with only BH072 supernatant gives a similar result. The partial leader cleavage by MrsT alone does not seem to be crucial for mersacidin activation.

## Figure S5 MALDI-TOF analysis of BH072 supernatant

### A Whole spectrum

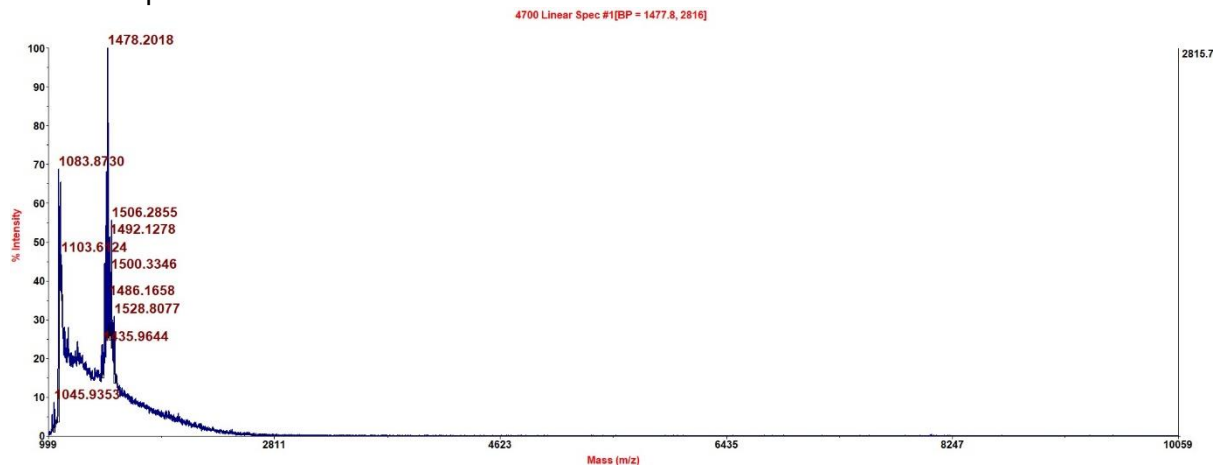

### B Close-up

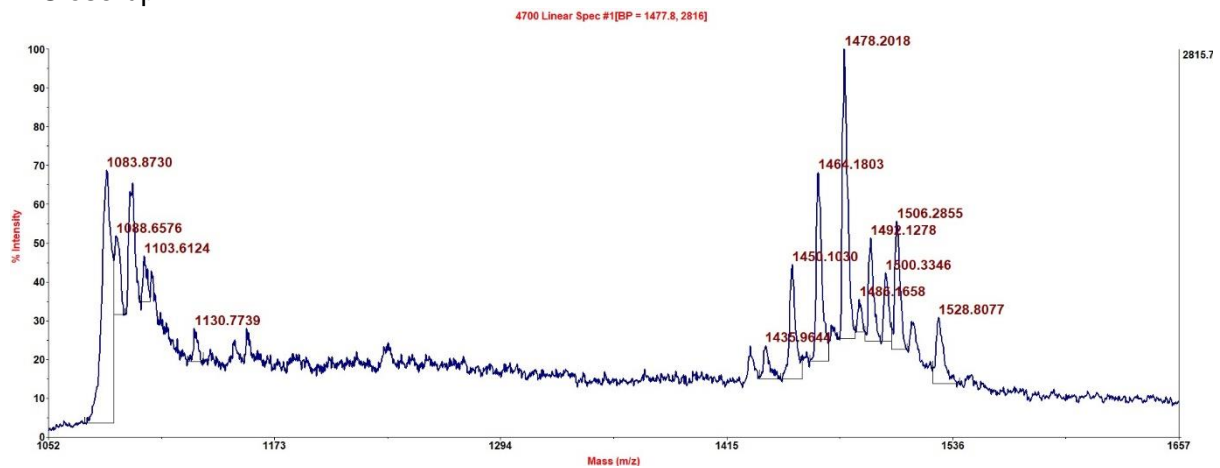

**Figure S5** MALDI-TOF analysis of supernatant from a 48-hour *B. amyloliquefaciens* BH072 culture. There is no mass detected resembling the reported mersacidin mass of 1826 Da<sup>1</sup> (Figure A). There are products present, which are shown in higher resolution below (Figure B). The supernatant was found to have no antimicrobial activity against *Micrococcus flavus* in any of the bacterial lawn spot tests.

**Figure S6** LC-MS of His-MrsA + MrsM and His-MrsA + MrsM + MrsD fractions

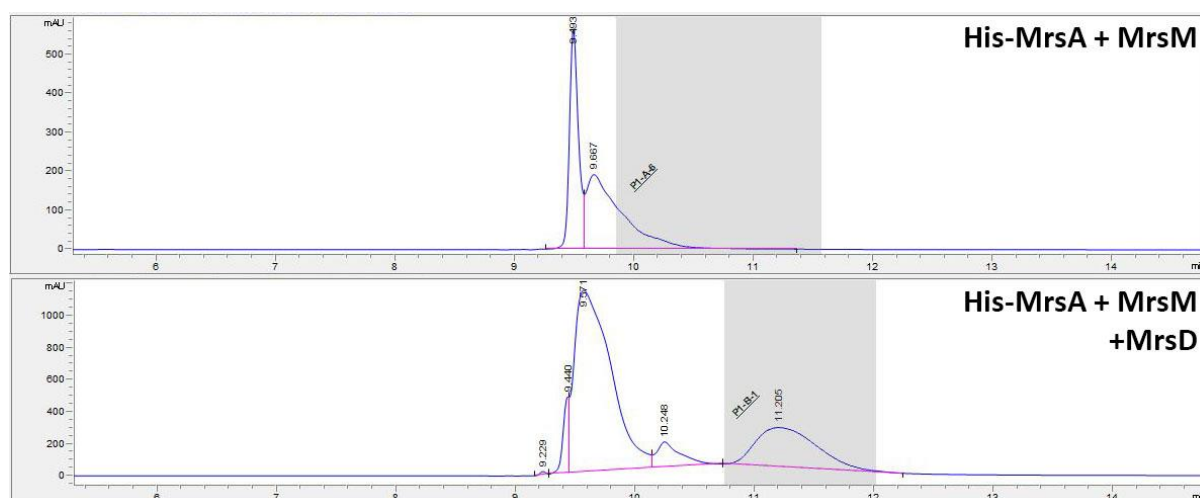

**Figure S6 A** Selection of HPLC fractions for LC-MS. To confirm the formation of fully modified His-premersacidin, fractions with the highest rate of modification were looked at. As hydrophobicity of lanthipeptides increases with dehydration and ring formation, the peaks with the highest retention time were selected for analysis by LC-MS. The degree of ring formation was later compared between His-MrsA + MrsM and His-MrsA + MrsM + MrsD through a free-cysteine assay. The products with the highest retention time were collected (grey area).

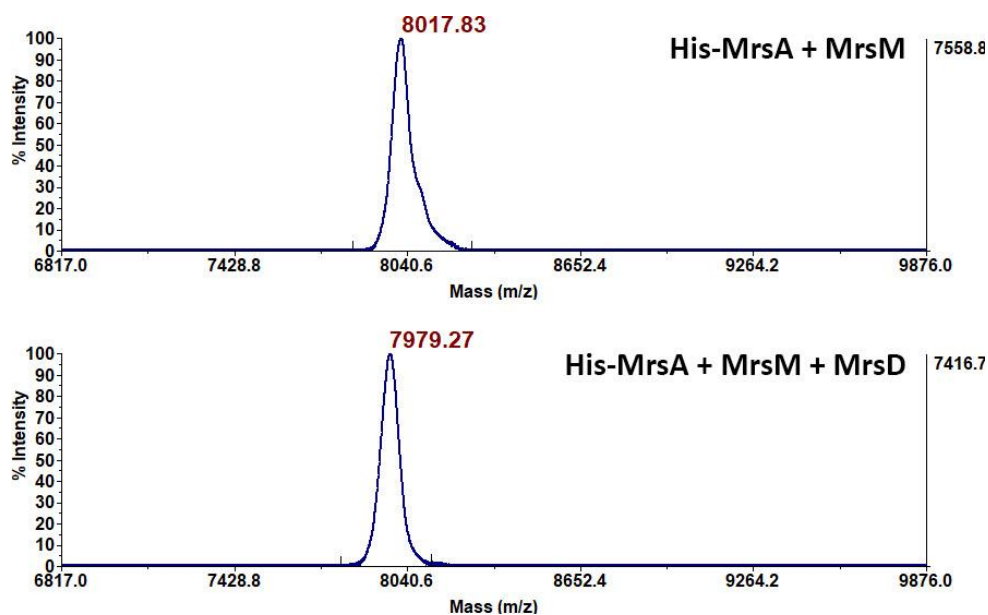

**Figure S6 B** Analysis of selected fractions by MALDI-TOF. The purified products were examined by MALDI-TOF. The spectra are similar to that of the pre-HPLC MALDI-TOF spectra.



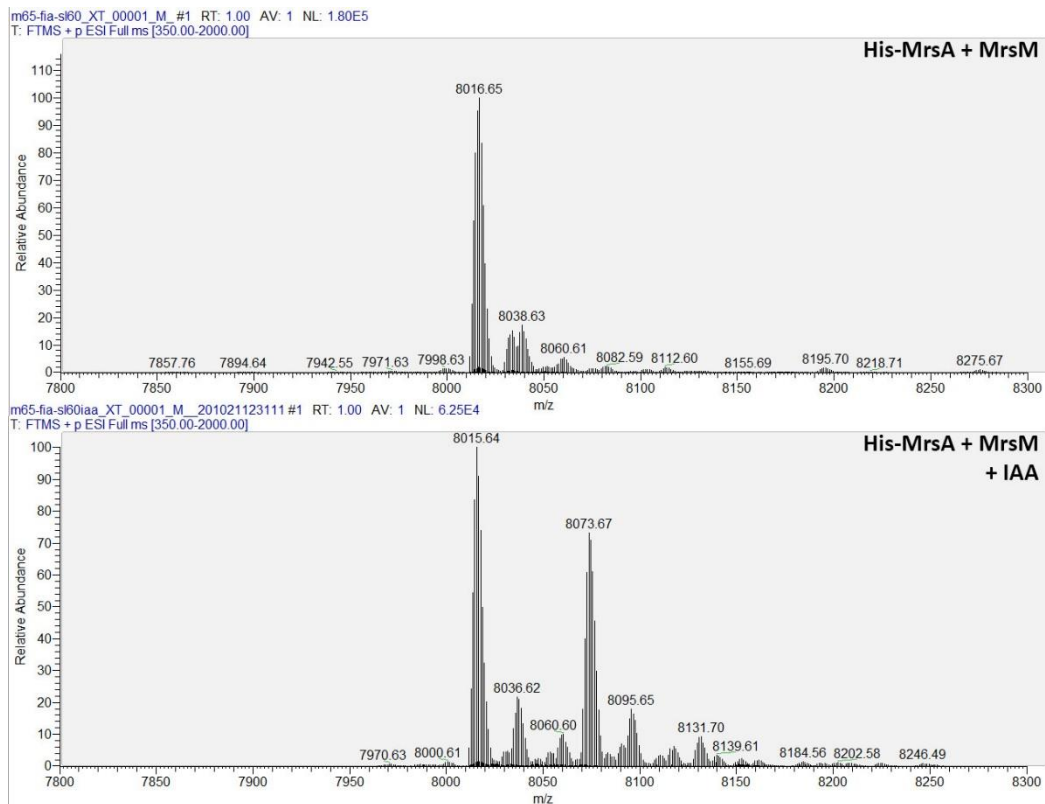

**Figure S6 C** LC-MS and free-cysteine assay His-MrsA + MrsM. The exact mass of the HPLC purified fraction of His-MrsA + MrsM was determined by LC-MS, in combination with an iodoacetamide (IAA) free cysteine assay. Part of the His-MrsA + MrsM peak 8016.64 Da peak (five dehydrations) shifts to 8073.67, indicating one derivatisation of cysteine by IAA in ca. 50 % of the product. The remaining 8015.64 Da peak thus has five dehydrations and rings formed. Although complete modification by MrsM is thus possible without MrsD, the fraction studied here is a minor product of the His-MrsA + MrsM pre-HPLC sample. The procedure was performed by the RUG Interfaculty Mass Spectrometry Center (IMSC), as follows: Control - 20  $\mu$ l sample + 20  $\mu$ l 100 mM ABC + 20  $\mu$ l 5 % FA + 40  $\mu$ l Milli-Q (without IAA). Assay - 20  $\mu$ l sample + 20  $\mu$ l 55 mM IAA in 100mM ABC (incubate at RT for 45 min) then 20  $\mu$ l 5% FA + 40  $\mu$ l Milli-Q (with IAA). Of each sample 5  $\mu$ l was injected

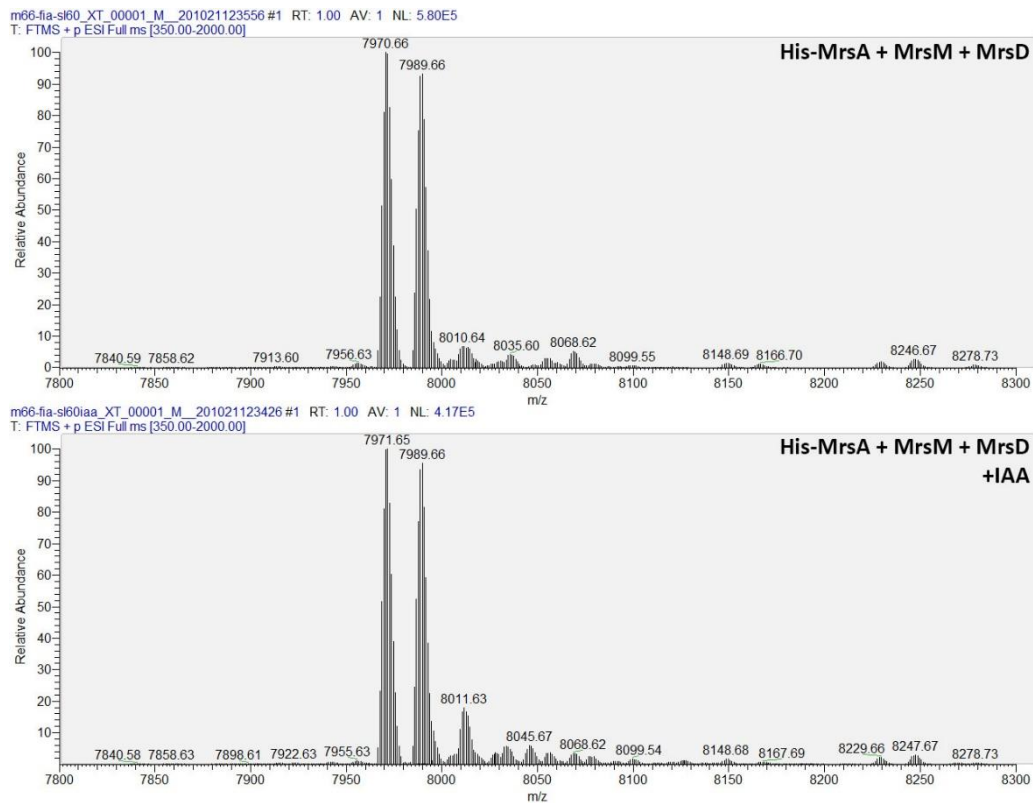

**Figure S6 D** LC-MS and free-cysteine assay His-MrsA + MrsM + MrsD. *The exact mass of the HPLC purified fraction of His-MrsA + MrsM + MrsD was determined by LC-MS, in combination with an iodoacetamide (IAA) free cysteine assay. The peaks of His-MrsA + MrsM + MrsD do not shift, meaning that the 7971.7 Da and the 7989.7 Da peak have five and four dehydrations and rings, respectively. The 7971.7 Da peak is thus his-premersacidin, while the 7989.7 Da peak lacks one dehydration and subsequent ring formation. The procedure was identical to that described for His-MrsA + MrsM.*

**Figure S7** Optimization of the expression protocol

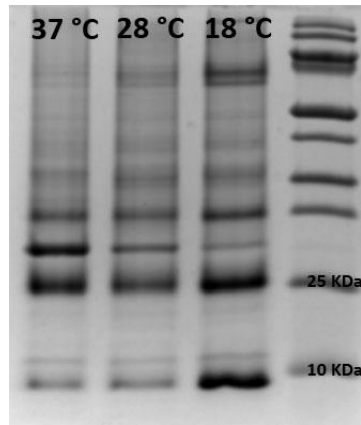

**Figure S7-1 A** Total yield comparison of 16-hour expression after induction at 37 °C, 28 °C, and 18 °C. The tricine<sup>4</sup> gel shows an expected ca. 8 KDa band for all samples, most prominent in the sample from 18 °C.

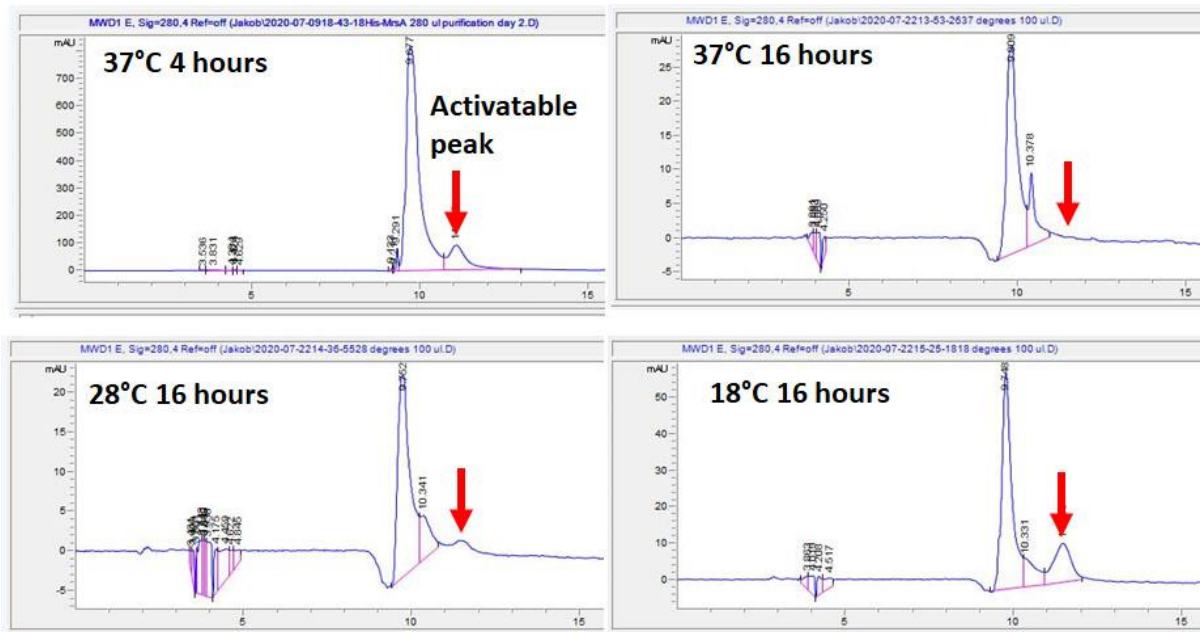

**Figure S7-1 B** Comparison of modification efficiency by HPLC. The modification efficiency was compared by the relative size of the peak containing activatable His-premersacidin. The relative amount of activatable peak is highest in the 18 °C sample.

**Figure S7-1 C** The higher total yield, and modification efficiency is consistent with the largest halo in the antimicrobial activity test for the 18 °C expression temperature (1C, 3C). For overnight expression, the temperature is negatively correlated with the yield and modification efficiency.

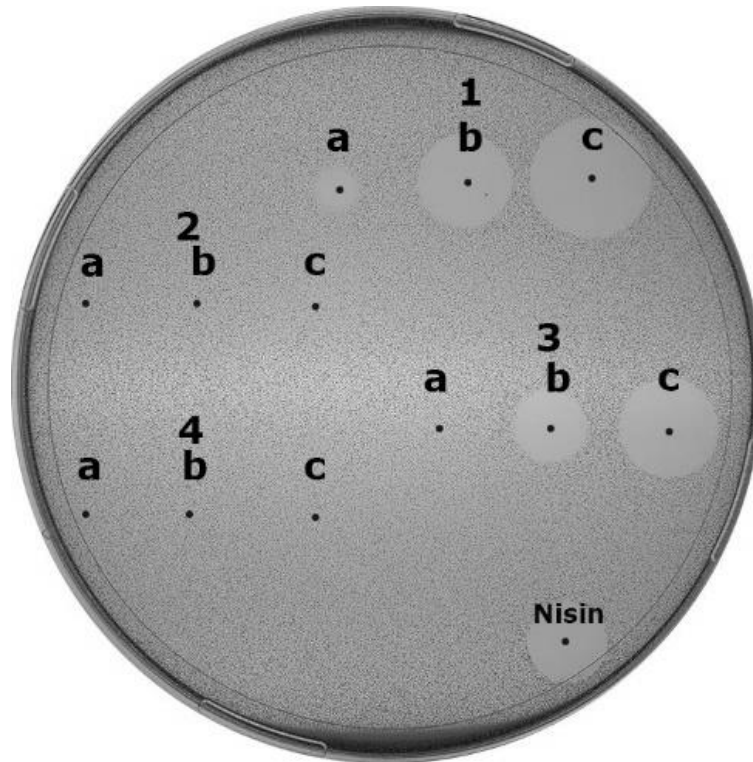

| 1000x<br>from<br>medium |   | Peptide from<br>expression at<br>respective<br>temperatures (µl) |       |       | BH072<br>supernatant<br>(µl) | Milli-Q-<br>water<br>(µl) |
|-------------------------|---|------------------------------------------------------------------|-------|-------|------------------------------|---------------------------|
|                         |   | 37 °C                                                            | 28 °C | 18 °C | SN(48)                       | MQ                        |
| 1                       | a | 7                                                                |       |       | 3                            |                           |
|                         | b |                                                                  | 7     |       | 3                            |                           |
|                         | c |                                                                  |       | 7     | 3                            |                           |
| 2                       | a | 7                                                                |       |       |                              | 3                         |
|                         | b |                                                                  | 7     |       |                              | 3                         |
|                         | c |                                                                  |       | 7     |                              | 3                         |
| 3                       | a | 2                                                                |       |       | 3                            | 5                         |
|                         | b |                                                                  | 2     |       | 3                            | 5                         |
|                         | c |                                                                  |       | 2     | 3                            | 5                         |
| 4                       | a | 2                                                                |       |       |                              | 8                         |
|                         | b |                                                                  | 2     |       |                              | 8                         |
|                         | c |                                                                  |       | 2     |                              | 8                         |

Of each spot 9 µl, also nisin 25 ng/µl

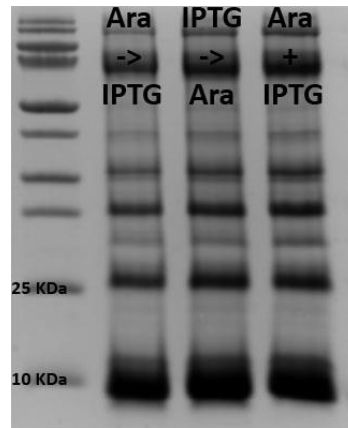

**Figure S7-2 A** Production yield of different induction order of MrsM and MrsD. After the initial growth time following dilution of the overnight culture, the cultures were induced at 16 °C with either Arabinose, IPTG, or Arabinose + IPTG. Two hours after the first induction, IPTG was added to the culture initially induced with arabinose, and vice versa. The cultures were grown overnight before purification. The tricine gel shows the initial induction with only IPTG seems to result in a higher yield.

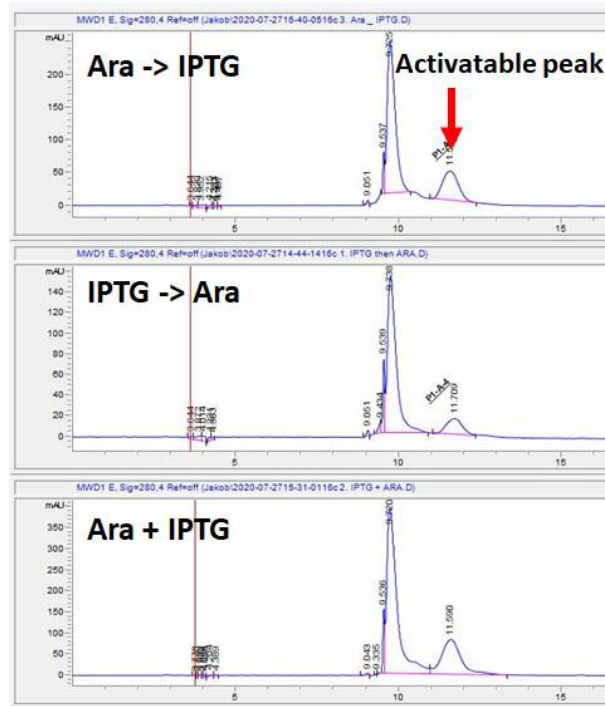

**Figure S7-2 B** Modification efficiency of different induction order of MrsM and MrsD. The modification rate of IPTG->Ara was the lowest, as determined by HPLC analysis. Ara -> IPTG and Ara + IPTG appear similar in yield and modification efficiency.

**Figure S7-2 C** Antimicrobial activity test of different induction order of MrsM and MrsD. Here, the sample from Ara + IPTG seems to have a slightly larger halo than Ara -> IPTG, and certainly than IPTG -> Ara. Since this induction protocol is also the most convenient, induction timing was not looked further into

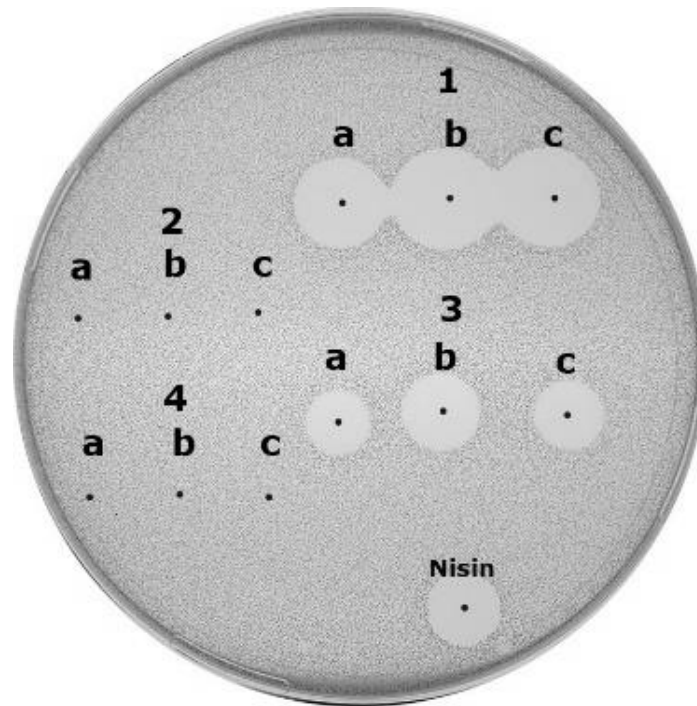

| 1000x<br>from<br>medium |   | Peptide from<br>expression from<br>respective<br>induction times<br>( $\mu$ l) |                  |                    | BH072<br>supernatant<br>( $\mu$ l) | Milli-<br>Q-<br>water<br>( $\mu$ l) |
|-------------------------|---|--------------------------------------------------------------------------------|------------------|--------------------|------------------------------------|-------------------------------------|
|                         |   | IPTG<br>-><br>Ara                                                              | IPTG<br>+<br>Ara | Ara -<br>><br>IPTG | SN(48)                             | MQ                                  |
| 1                       | a | 2.5                                                                            |                  |                    | 3                                  | 4.5                                 |
|                         | b |                                                                                | 2.5              |                    | 3                                  | 4.5                                 |
|                         | c |                                                                                |                  | 2.5                | 3                                  | 4.5                                 |
| 2                       | a | 2.5                                                                            |                  |                    |                                    | 7.5                                 |
|                         | b |                                                                                | 2.5              |                    |                                    | 7.5                                 |
|                         | c |                                                                                |                  | 2.5                |                                    | 7.5                                 |
| 3                       | a | 0.5                                                                            |                  |                    | 3                                  | 6.5                                 |
|                         | b |                                                                                | 0.5              |                    | 3                                  | 6.5                                 |
|                         | c |                                                                                |                  | 0.5                | 3                                  | 6.5                                 |
| 4                       | a | 0.5                                                                            |                  |                    |                                    | 9.5                                 |
|                         | b |                                                                                | 0.5              |                    |                                    | 9.5                                 |
|                         | c |                                                                                |                  | 0.5                |                                    | 9.5                                 |

Of each spot 9  $\mu$ l, nisin 25 ng/ $\mu$ l

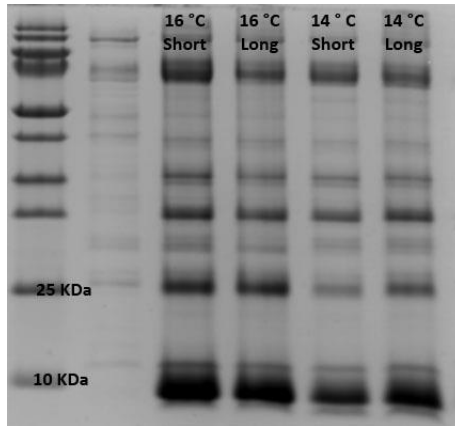

**Figure S7-3 A** Production yield of 16-hour and 24-hour expression after induction at 16 °C and 14 °C. The tricine gel shows that the production yields are clearly the highest in the 16 °C samples, for this configuration it is the optimal expression temperature.

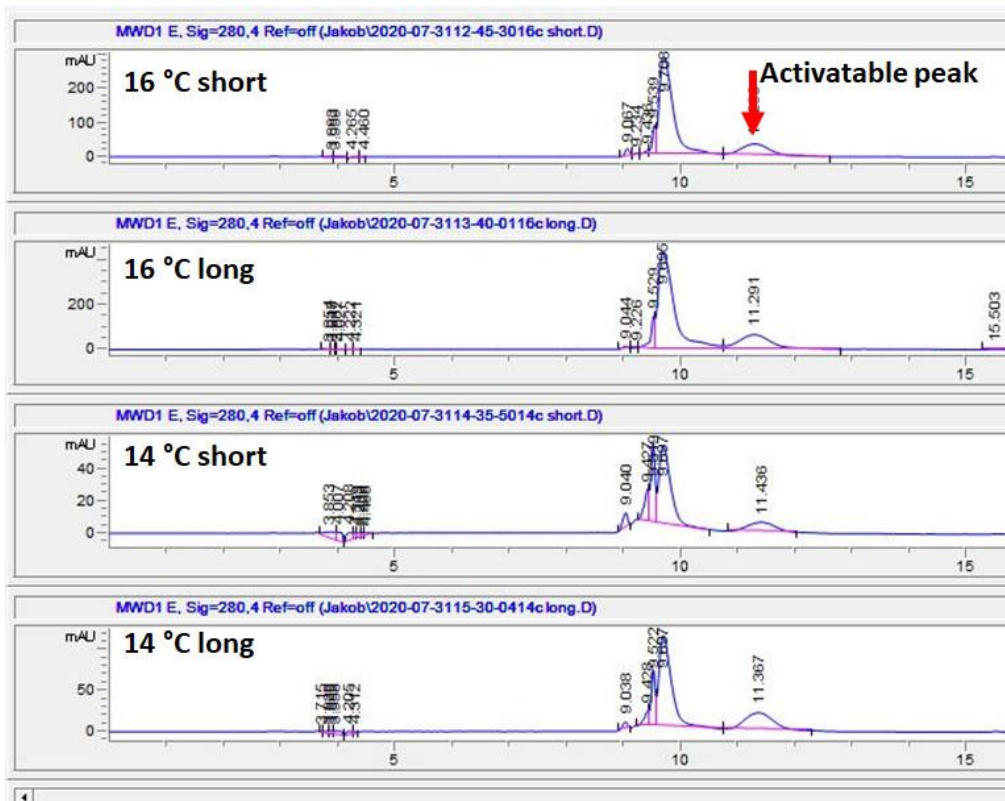

**Figure S7-3 B** Modification efficiency of 16-hour and 24-hour expression after induction at 16 °C and 14 °C. HPLC analysis shows that expression time with an additional eight hours significantly increases modification efficiency

**Figure S7-3 C** Antimicrobial activity test of 16-hour and 24-hour expression after induction at 16 °C and 14 °C In the antimicrobial activity test, it can be clearly seen that expression at 14 °C leads to a lower production. The higher production, but more significantly the higher modification rate, of a 24-hour expression time increases the antimicrobial activity.

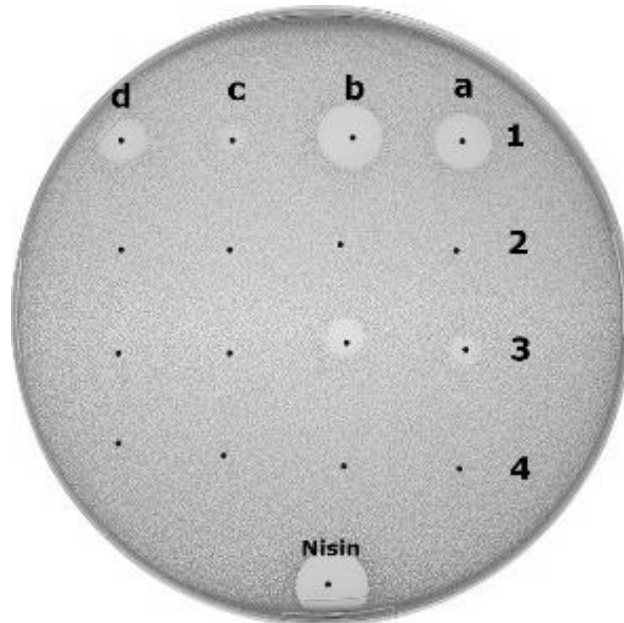

|                   |   | Peptide from expression at respective temperatures (µl) |            |             |            | BH072 supernatant (µl) | Milli-Q-water (µl) |
|-------------------|---|---------------------------------------------------------|------------|-------------|------------|------------------------|--------------------|
| 1000x from medium |   | 16 °C short                                             | 16 °C long | 14 °C short | 14 °C long | SN(48)                 | Milli-Q            |
| 1                 | a | 2,5                                                     |            |             |            | 3                      | 4,5                |
|                   | b |                                                         | 2,5        |             |            | 3                      | 4,5                |
|                   | c |                                                         |            | 2,5         |            | 3                      | 4,5                |
|                   | d |                                                         |            |             | 2,5        | 3                      | 4,5                |
| 2                 | a | 2,5                                                     |            |             |            |                        | 7,5                |
|                   | b |                                                         | 2,5        |             |            |                        | 7,5                |
|                   | c |                                                         |            | 2,5         |            |                        | 7,5                |
|                   | d |                                                         |            |             | 2,5        |                        | 7,5                |
| 3                 | a | 0,5                                                     |            |             |            | 3                      | 6,5                |
|                   | b |                                                         | 0,5        |             |            | 3                      | 6,5                |
|                   | c |                                                         |            | 0,5         |            | 3                      | 6,5                |
|                   | d |                                                         |            |             | 0,5        | 3                      | 6,5                |
| 4                 | a | 0,5                                                     |            |             |            |                        | 9,5                |
|                   | b |                                                         | 0,5        |             |            |                        | 9,5                |
|                   | c |                                                         |            | 0,5         |            |                        | 9,5                |
|                   | d |                                                         |            |             | 0,5        |                        | 9,5                |

Of each spot 9 µl, nisin 25 ng/µl



**Figure S7-4 A** Modification efficiency of MrsM with an amino acid sequence restored to that of HIL-Y85/54728. When expressed under the optimal conditions determined for the original setup, the modification efficiency when using the HIL-Y85/54728 MrsM is significantly lower than that of BH072. As the HPLC results have consistently matched the activity test-results, the characteristics of modification by HIL-Y85/54728 MrsM were not further looked into.

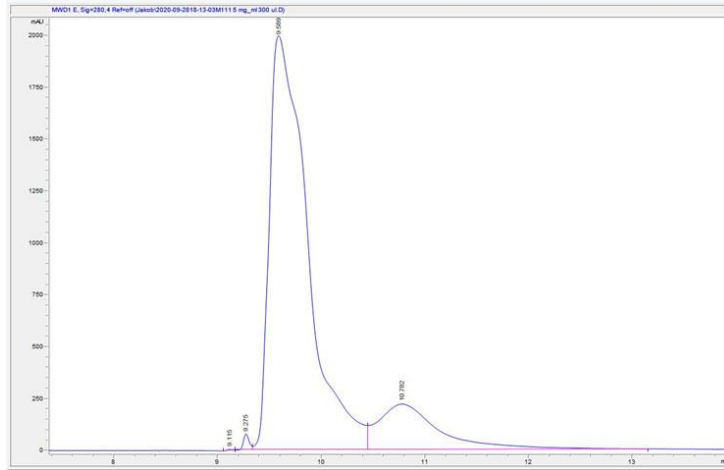

**Table S1** List of primers used in this study

| Primer Sequence                           | Goal Plasmid                                            | Function             | Template                                                     | Site                      |        |
|-------------------------------------------|---------------------------------------------------------|----------------------|--------------------------------------------------------------|---------------------------|--------|
| GATCGGTCTCGCTCGCCACCGCTGAGCAATAAC         | pACYC duet<br>( <i>thnA-His</i> ) +<br>( <i>mrsM</i> )* | Backbone fw          | pACYC duet<br>( <i>ThnA-His</i> ) + ( ) †                    | Eco31I                    |        |
| GATCGGTCTCCTCTTCTTATACCTTAATAATACTAAG     |                                                         | Backbone rv          |                                                              | Eco31I                    |        |
| GATGGGTCTCCAGGATCAATATGCATACAAAATTCAAACGG |                                                         | Insert fw            |                                                              | pL <i>mrsM</i> †          | Eco31I |
| GATCGGTCTCAGAGCTCACTCCTAAGAAATAGAGCC      |                                                         | Insert rv            |                                                              |                           | Eco31I |
| CACTAACTGCAGCAAGCTTG                      | pACYC duet<br>( <i>mrsA-His</i> ) +<br>( <i>mrsM</i> )* | Backbone fw          | pACYC duet<br>( <i>thnA-His</i> ) +<br>( <i>mrsM</i> )       | PstI                      |        |
| CATGGGTCTCCCATGGTATATCTCCTTATTAAG         |                                                         | Backbone rv          |                                                              | Eco31I                    |        |
| CATGGGTCTCCCATGAGTCAAGAAGCTATCATTGG       |                                                         | Insert fw            | pNZ8048 <i>mrsA</i> -<br><i>His</i> †                        | Eco31I                    |        |
| GATCCTGCAGGGTTCAAAGAAAGCTTAAATTAG         |                                                         | Insert rv            |                                                              | PstI                      |        |
| GACGGGTCTCGCATGGTATATCTCCTTATTAAGTTAAAC   | pACYC duet<br>( <i>His-mrsA</i> ) +<br>( <i>mrsM</i> )  | Backbone fw          | pACYC duet<br>( <i>mrsA-His</i> ) +<br>( <i>mrsM</i> )*      | PstI                      |        |
| GACGGGTCTCGATAATTTAAGCTTTCTTTGAACCCTGC    |                                                         | Backbone rv          |                                                              | Eco31I                    |        |
| GACGGGTCTCCCATGCACCATCATCACCATC           |                                                         | Insert fw            | pNZ8048 <i>His</i> -<br><i>mrsA</i> †                        | Eco31I                    |        |
| GACGCTGCAGGGTTCAAAGAAAGCTTAAATTAACAAATAC  |                                                         | Insert rv            |                                                              | Eco31I                    |        |
| GCTGCTGCAGGCATGCAAGC                      | pBAD ( <i>mrsD</i> )                                    | Backbone fw          | pBAD                                                         | PstI                      |        |
| CATGCCATGGTGAATTCCTCCTGCTAGCCC            |                                                         | Backbone rv          |                                                              | NcoI                      |        |
| GACGGGTCTCGCATGAGTATTTCAATATTAAGATAAAAAAG |                                                         | Insert fw            | BH072 Genomic<br>DNA                                         | Eco31I                    |        |
| GCAGCTGCAGCATCCATTTATGTTAGTGAGG           |                                                         | Insert rv            |                                                              | PstI                      |        |
| GACGGGTCTCCTAATGCCTTACTTTGTTAAGGCTC       | pACYC ( <i>His</i> -<br><i>mrsA</i> )                   | Round PCR fw         | pACYC duet ( <i>His</i> -<br><i>mrsA</i> ) + ( <i>mrsM</i> ) | Eco31I                    |        |
| GACGGGTCTCGATTACTTTCTGTTCCGACTTAAGC       |                                                         | Round PCR rv         |                                                              | Eco31I                    |        |
| GGTGTTCATGGTATATCTC                       | pACYC<br>( <i>mrsT150</i> -<br><i>His</i> )             | Backbone fw          | pACYC duet<br>( <i>ThnA-His</i> ) + ( ) †                    | PstI                      |        |
| GGACATCATCACCATCATCACTAAC                 |                                                         | Backbone rv          |                                                              | NcoI                      |        |
| GCCACCTGCAGCAGCGGCCTCAGTGATG              |                                                         | Insert fw            |                                                              | pL ( <i>MrsT150-His</i> ) | Eco31I |
| GACGGGTCTCCCATGAGAAGAAGAGTTCTCTAGTAAG     |                                                         | Insert rv            |                                                              | †                         | PstI   |
| GGCGTATCATGCCATACCGCGAAAG                 |                                                         | pACYC sequencing fw  |                                                              |                           |        |
| TTGCACGGCGTCACACTTTG                      |                                                         | pBAD sequencing fw   |                                                              |                           |        |
| TACTGCCGCCAGGCAAATTC                      |                                                         | pBAD sequencing rv   |                                                              |                           |        |
| GCCGCATAATGCTTAAGTCC                      |                                                         | MrsM sequencing 1 fw |                                                              |                           |        |
| GTATTGGATTCAAATACTTCTGATCTC               |                                                         | MrsM sequencing 2 fw |                                                              |                           |        |
| TGCTCGAACAAATAGATTCTTTAAAGG               |                                                         | MrsM sequencing 3 fw |                                                              |                           |        |
| ATCGAAAGGGATGAAAACAACG                    |                                                         | MrsM sequencing 4 fw |                                                              |                           |        |

\* Only used for cloning purposes in this study

† Gene originates from, and remains similar to that on BH072 genome, from previous unpublished work

**Table S2** HPLC protocol

All samples analyzed or purified by HPLC were run using the following protocol, using a NUCLEODUR C18 HTec, 5  $\mu$ m, 250x4.6 mm column at ambient temperature.

| <b>Time [min]</b> | <b>A [%]</b> | <b>B [%]</b> | <b>Flow [mL/min]</b> |
|-------------------|--------------|--------------|----------------------|
| <b>0.00</b>       | 95.0         | 5.0          | 1.000                |
| <b>2.00</b>       | 95.0         | 5.0          | 1.000                |
| <b>3.00</b>       | 65.0         | 35.0         | 1.000                |
| <b>4.00</b>       | 65.0         | 35.0         | 1.000                |
| <b>25.00</b>      | 59.0         | 41.0         | 1.000                |
| <b>26.00</b>      | 5.0          | 95.0         | 1.000                |
| <b>32.00</b>      | 5.0          | 95.0         | 1.000                |

**Table S3** Mersacidin mass tables

All masses in Dalton

Leader + core-peptide

|                     | Mono-isotopic |           | Average   |           |
|---------------------|---------------|-----------|-----------|-----------|
|                     | His-MrsA      | +MrsD     | His-MrsA  | +MrsD     |
| <b>Dehydrations</b> | 8103.7039     | 8057.6984 | 8108.9928 | 8062.9668 |
| <b>1</b>            | 8085.6934     | 8039.6879 | 8090.9823 | 8044.9563 |
| <b>2</b>            | 8067.6828     | 8021.6773 | 8072.9717 | 8026.9457 |
| <b>3</b>            | 8049.6722     | 8003.6667 | 8054.9611 | 8008.9351 |
| <b>4</b>            | 8031.6617     | 7985.6562 | 8036.9506 | 7990.9246 |
| <b>5</b>            | 8013.6511     | 7967.6456 | 8018.9400 | 7972.9140 |

Core peptide

|                     | Mono-isotopic |           | Average   |           |
|---------------------|---------------|-----------|-----------|-----------|
|                     | His-MrsA      | +MrsD     | His-MrsA  | +MrsD     |
| <b>Dehydrations</b> | 1961.8481     | 1915.8426 | 1963.3083 | 1917.2823 |
| <b>1</b>            | 1943.8375     | 1897.8320 | 1945.2977 | 1899.2717 |
| <b>2</b>            | 1925.8270     | 1879.8215 | 1927.2871 | 1881.2611 |
| <b>3</b>            | 1907.8164     | 1861.8109 | 1909.2766 | 1863.2506 |
| <b>4</b>            | 1889.8059     | 1843.8004 | 1891.2660 | 1845.2400 |
| <b>5</b>            | 1871.7953     | 1825.7898 | 1873.2554 | 1827.2294 |

Core peptide + six amino acids (result of cleavage by MrsT150-His)

|                     | Mono-isotopic |           | Average   |           |
|---------------------|---------------|-----------|-----------|-----------|
|                     | His-MrsA      | +MrsD     | His-MrsA  | +MrsD     |
| <b>Dehydrations</b> | 2536.0538     | 2490.0483 | 2537.9150 | 2491.8890 |
| <b>1</b>            | 2518.0433     | 2472.0378 | 2519.9045 | 2473.8785 |
| <b>2</b>            | 2500.0327     | 2454.0272 | 2501.8939 | 2455.8679 |
| <b>3</b>            | 2482.0221     | 2436.0166 | 2483.8833 | 2437.8573 |
| <b>4</b>            | 2464.0116     | 2418.0061 | 2465.8728 | 2419.8468 |
| <b>5</b>            | 2446.0010     | 2399.9955 | 2447.8622 | 2401.8362 |

**Table S4** Table of approximate percentage activatable peak of total product as determined by HPLC

| <b>Induction protocol</b>                | <b>Percentage activatable peak of total</b> |
|------------------------------------------|---------------------------------------------|
| <b>37 °C 4-5 hours</b>                   | 15 %                                        |
| <b>37 °C 16 hours</b>                    | <1 %                                        |
| <b>28 °C 16 hours</b>                    | 5 %                                         |
| <b>18 °C 16 hours</b>                    | 20,3 %                                      |
| <b>16 °C 16 hours Ara -&gt; IPTG</b>     | 27,7 %                                      |
| <b>16 °C 16 hours Ara + IPTG</b>         | 27,3 %                                      |
| <b>16 °C 16 hours IPTG -&gt; Ara</b>     | 18,3 %                                      |
| <b>16 °C 16 hours</b>                    | 20 %                                        |
| <b>16 °C 24 hours</b>                    | 25-30 %                                     |
| <b>14 °C 16 hours</b>                    | 20 % NB. Total production lower             |
| <b>14 °C 24 hours</b>                    | 25-30 % NB. Total production lower          |
| <b>16 °C 24 hours MrsM HIL-Y85/54728</b> | 15 %                                        |

From the above, an optimal expression protocol can be distilled, i.e. induction at 16 °C, followed by a 24-hour expression time.

## References

1. Herzner, A. M. *et al.* Expression of the lantibiotic mersacidin in *Bacillus amyloliquefaciens* FZB42. *PLoS One* **6**, 1–8 (2011).
2. Altena, K., Guder, A., Cramer, C. & Bierbaum, G. Biosynthesis of the lantibiotic mersacidin: Organization of a type B lantibiotic gene cluster. *Appl. Environ. Microbiol.* **66**, 2565–2571 (2000).
3. Zhao, X., de Jong, A., Zhou, Z. & Kuipers, O. P. Complete Genome Sequence of *Bacillus amyloliquefaciens* Strain BH072, Isolated from Honey. *Genome Announc.* **3**, 14–15 (2015).
4. Schägger, H. Tricine–SDS-PAGE. *Nat. Protoc.* **1**, 16–22 (2006).
